# Supplementary material
Source: MDPI journal article supplement (https://www.mdpi.com/2227-9717/10/11/2331)
Supplement: s1 [file s1]

# Supplementary materials for

Article

## Resource Utilization of Lake Sediment to Prepare “Sponge” Light Aggregate: Pore Structure and Water Retention Mechanism Study

Yu Huang <sup>1,2,3</sup>, Kunpeng Li <sup>1</sup>, Chi Zhou <sup>4</sup>, Xiaotian Du <sup>1</sup>, Jiangnan Peng <sup>1</sup>, Baowen Liang <sup>1</sup>, Ziyi Ding <sup>1</sup> and Wen Xiong <sup>1,2,3,\*</sup>

<sup>1</sup> School of Civil Engineering, Architecture and Environment, Hubei University of Technology, Wuhan 430068, China

<sup>2</sup> National Engineering Research Center for Advanced Technology and Equipment of Water Environmental Pollution Monitoring, Wuhan 430068, China

<sup>3</sup> Hubei Key Laboratory of Ecological Restoration for River-Lakes and Algal Utilization, Wuhan 430068, China

<sup>4</sup> Hubei Water Resources Research Institute, Hubei Water Resources and Hydropower Science and Technology Promotion Center, Wuhan 430070, China

\* Correspondence: 20171017@hbut.edu.cn; Tel.: +86-13907164835

Table S1. Analyze data

| Anasyle index                               | Data                                                   |
|---------------------------------------------|--------------------------------------------------------|
| BET Surface Area                            | $0.65 \text{ m}^2 \cdot \text{g}^{-1}$                 |
| t-Plot micropore volume                     | $4.14 \times 10^{-4} \text{ cm}^3 \cdot \text{g}^{-1}$ |
| BJH Desorption average pore diameter (4V/A) | 31.58 nm                                               |

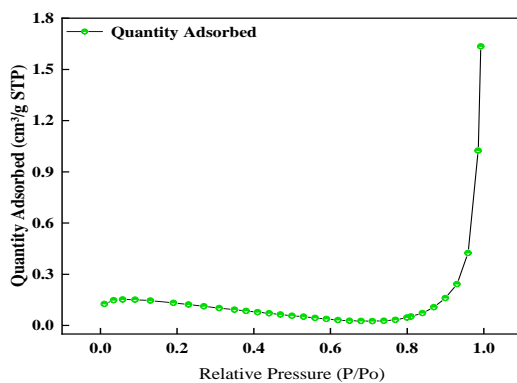

(a) Adsorption curve

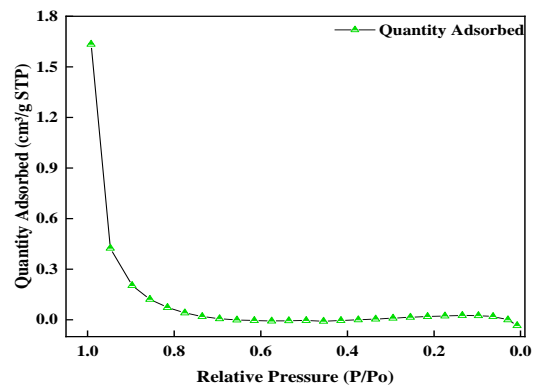

(b) Desorption curve

Figure S1. Ceramic pellet adsorption and desorption isotherms.

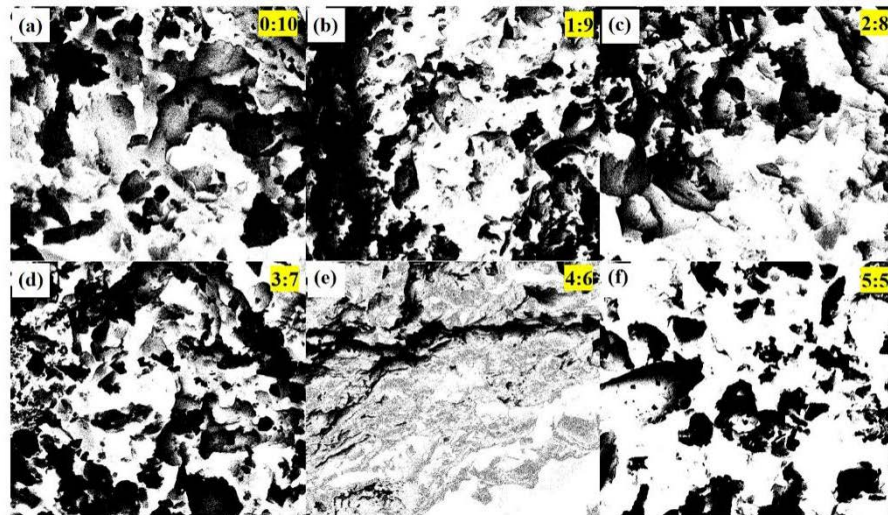

Figure S2. Two-dimensional SEM maps with different organic matter contents

Table S2. Analyze data

| Parameters | Sum of Per Area (Obj./Total) |
|------------|------------------------------|
| 0:10       | 68.94%                       |
| 1:9        | 71.24%                       |
| 2:8        | 79.87%                       |
| 3:7        | 80.12%                       |
| 4:6        | 83.01%                       |
| 5:5        | 89.88%                       |
